# Supplementary material for: Pyrene-Phosphonate Conjugate: Aggregation-Induced Enhanced Emission, and Selective Fe3+ Ions Sensing Properties
Source: PubMed Central journal article supplement (PMC6151600; doi:10.3390/molecules22091417), 2017-08-29
Supplement: molecules-22-01417-s001.pdf [file molecules-22-01417-s001.pdf]

# Supplementary Information

## Pyrene-Phosphonate Conjugate: Aggregation Induced Enhanced Emission, and Selective Fe<sup>3+</sup> Ions Sensing Properties

Sachin D. Padghan,<sup>1</sup> Rajesh S. Bhosale,\*<sup>1</sup> Sidhanath V. Bhosale,\*<sup>1</sup> Duong Duc La,<sup>2</sup> Akhil Gupta,<sup>3</sup> and Sheshanath V. Bhosale\*<sup>2</sup>

<sup>1</sup> Polymers and Functional Materials Division, CSIR-Indian Institute of Chemical Technology, Hyderabad-500007, Telangana, India

<sup>2</sup> School of Applied Sciences, RMIT University, GPO Box 2476, Melbourne Victoria 3001 Australia

<sup>3</sup> Institute for Frontier Materials, Deakin University, Waurn Ponds, Victoria 3216 Australia

\* Author to whom correspondence should be addressed; E-Mail: [bhosale@iict.res.in](mailto:bhosale@iict.res.in); [sheshanath.bhosale@rmit.edu.au](mailto:sheshanath.bhosale@rmit.edu.au)

Tel.: +61-3-9925-2680 (ext. 123); Fax: +61-3-9925-2680.

### Supplementary Figures

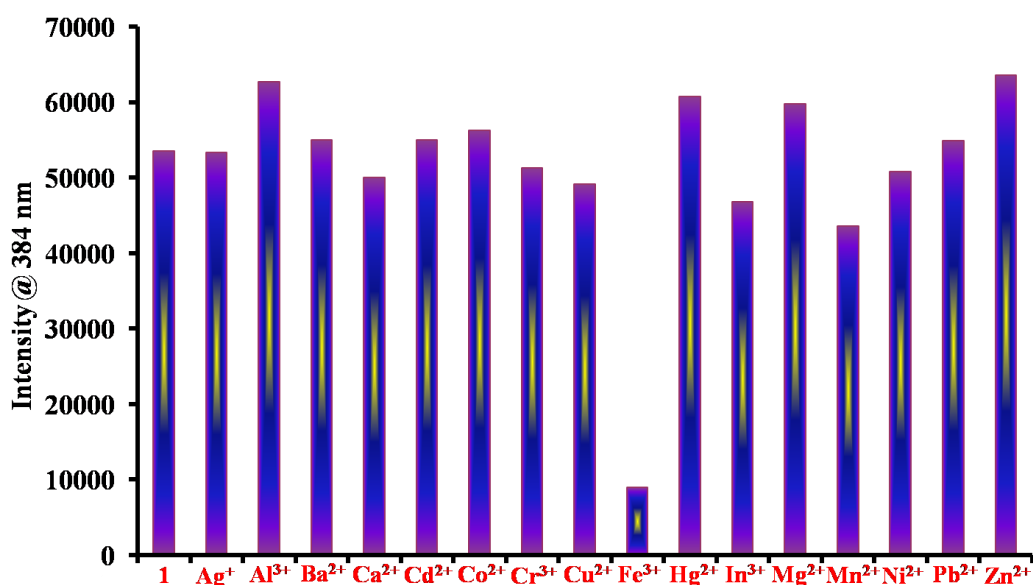

**Figure S1.** Relative fluorescence emission at 384 nm ( $\lambda_{\text{ex}} = 280$  nm) of **1** ( $1 \times 10^{-5}$  M solution in ACN:H<sub>2</sub>O, 1:1, v/v) and upon addition of an equimolar amount 10 equiv. of each perchlorate cations.

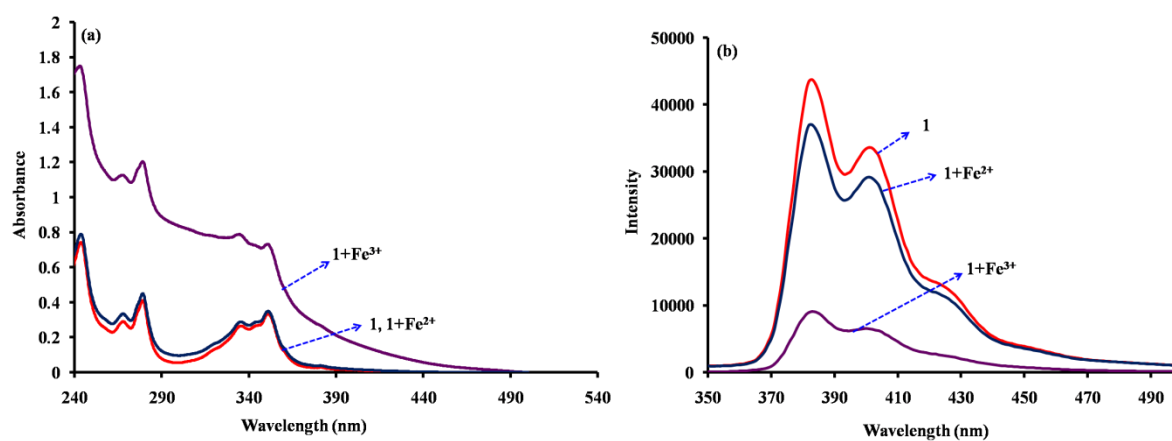

**Figure S2.** UV-vis (a) and fluorescence emission (b) spectral changes of **1** upon addition of Fe<sup>2+</sup> and Fe<sup>3+</sup>

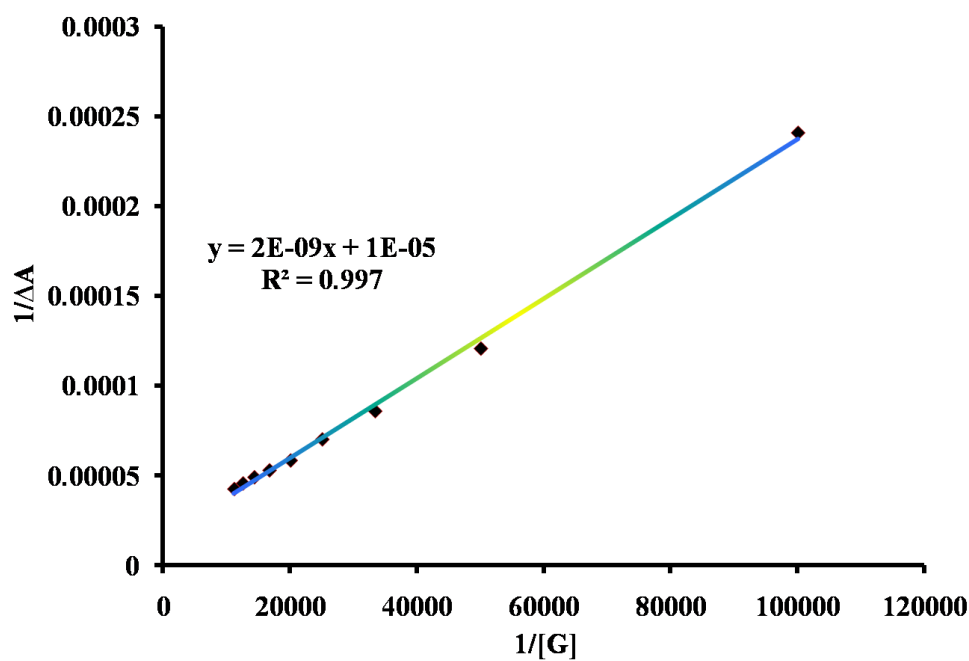

**Figure S3.** Binding constant of receptor **1** by Benesi-Hildebrand of Fe<sup>3+</sup> ion.

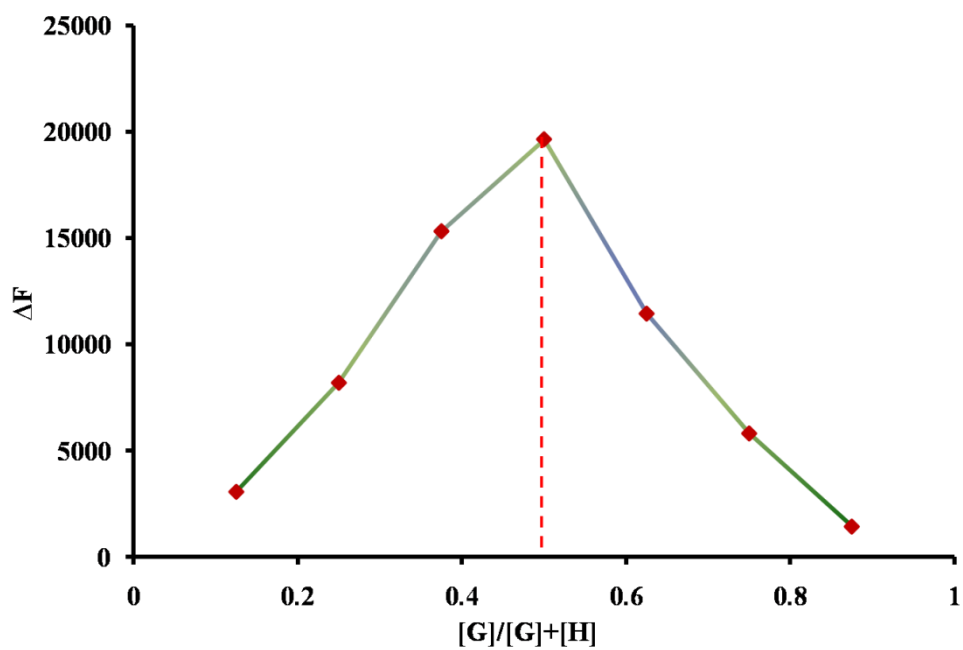

**Figure S4.** Job's plot for **1** with  $\text{Fe}^{3+}$  ions.

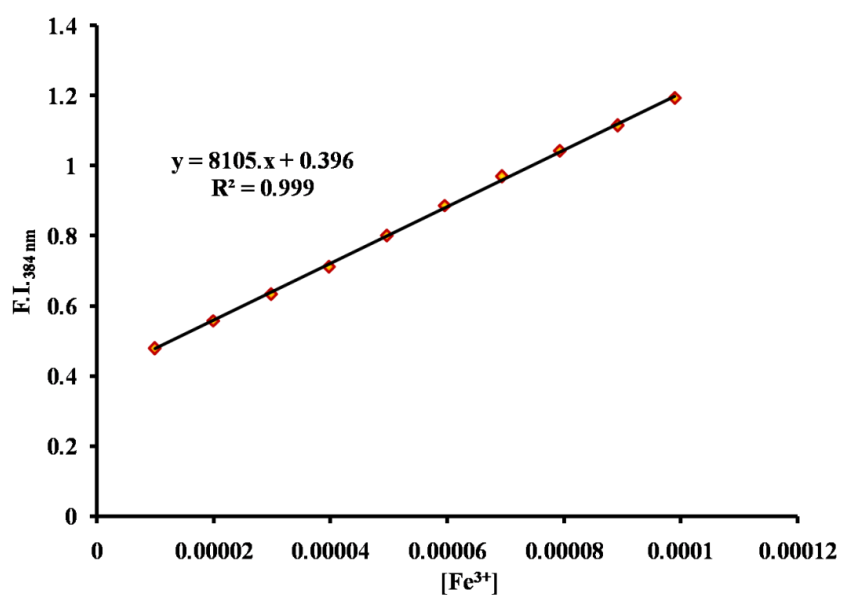

**Figure S5.** Calibration plot for successive addition of  $\text{Fe}^{3+}$  ion to **1** solution in ACN:H<sub>2</sub>O (1:1, v/v).

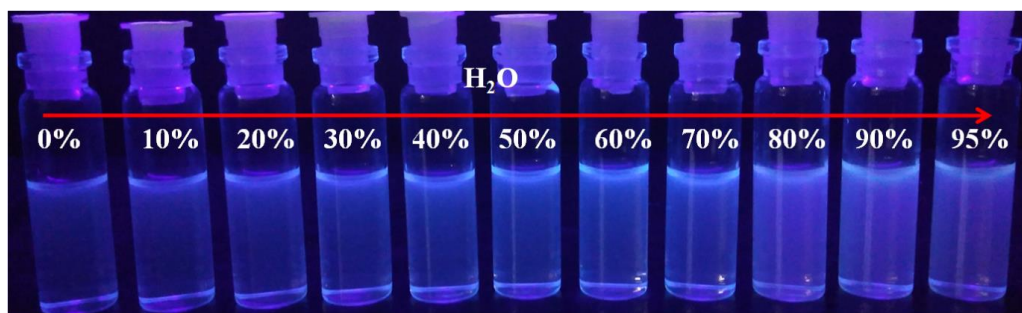

**Figure S6.** Photograph of aggregation induced emission visualized under UV light at 365 nm of **1** upon addition of water %'s in ACN.

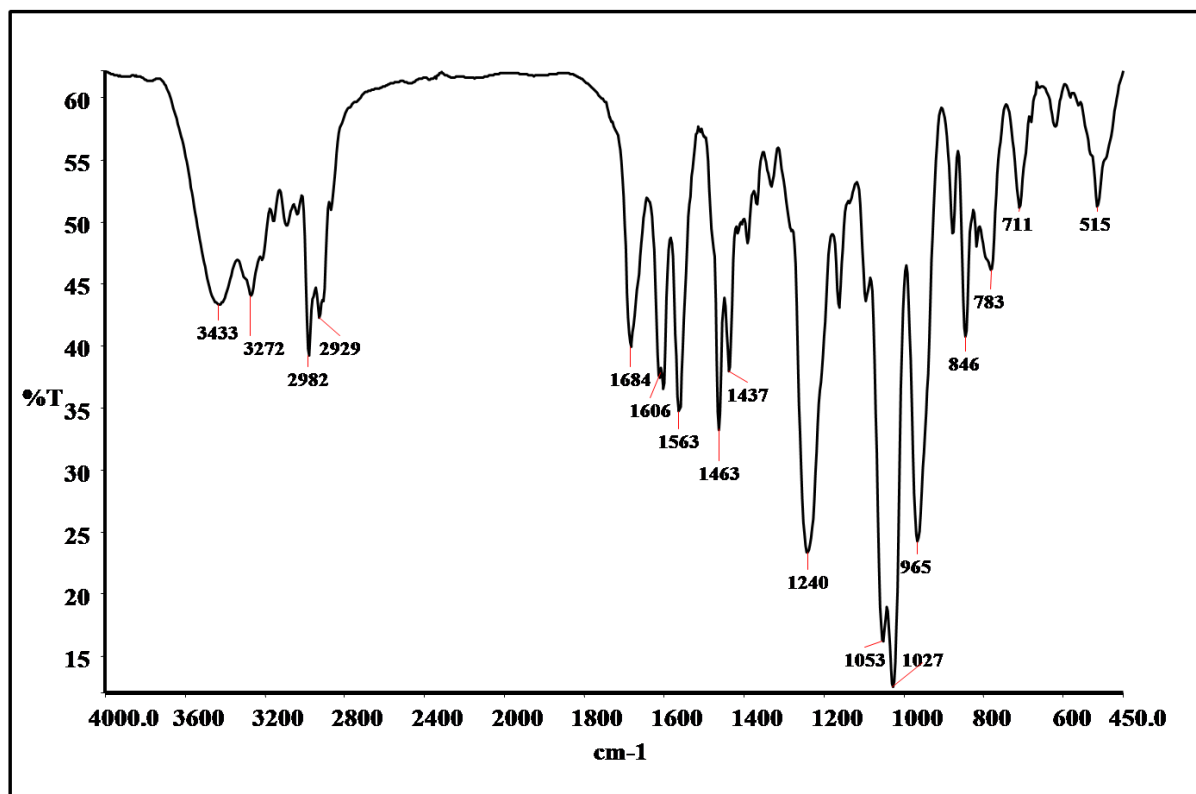

**Figure S7.** FT-IR spectra of compound **1**.

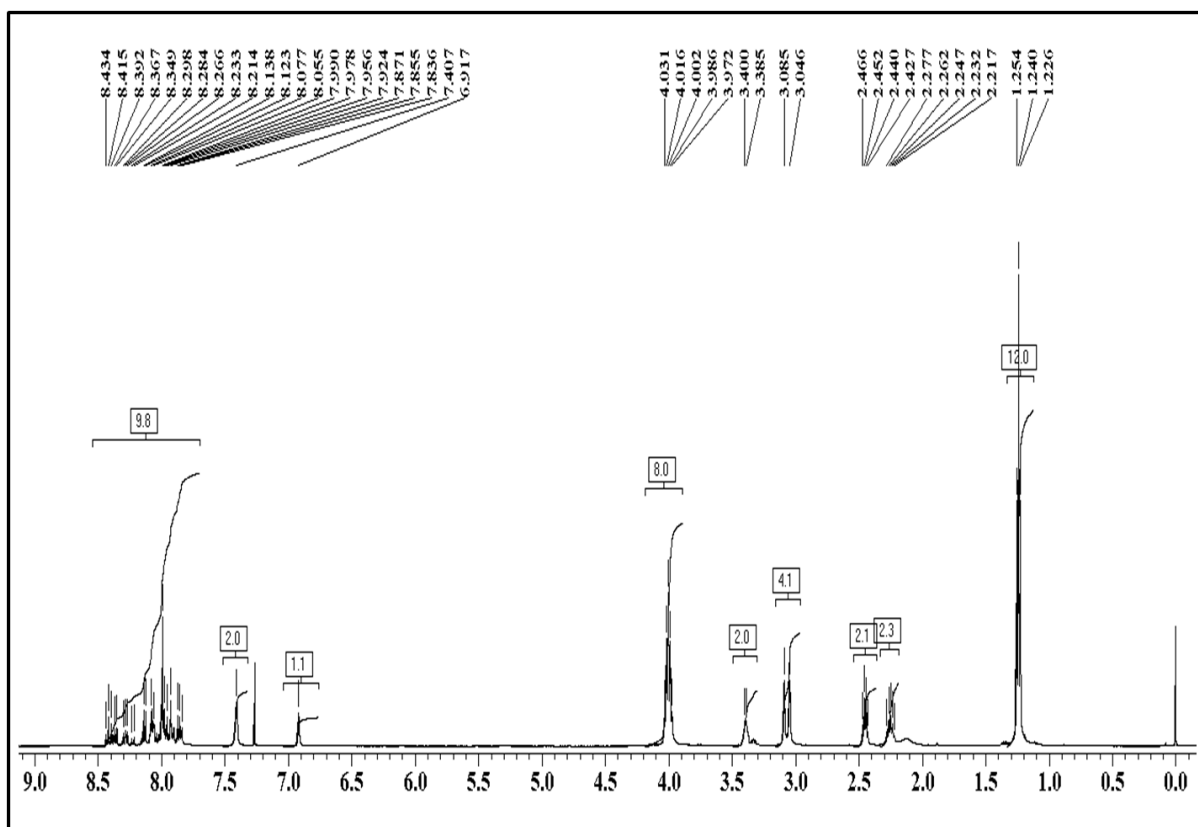

Figure S8.  $^1\text{H}$  NMR spectra of compound 1.

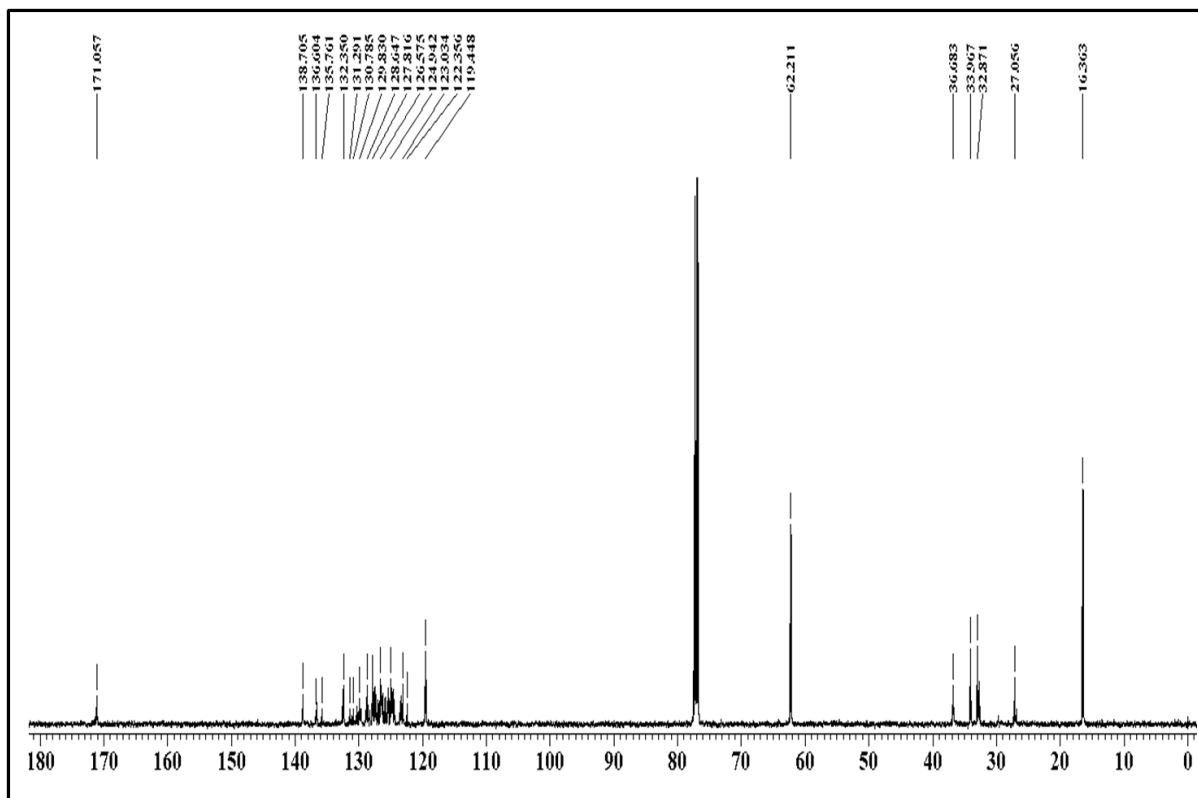

Figure S9.  $^{13}\text{C}$  NMR spectra of compound 1.

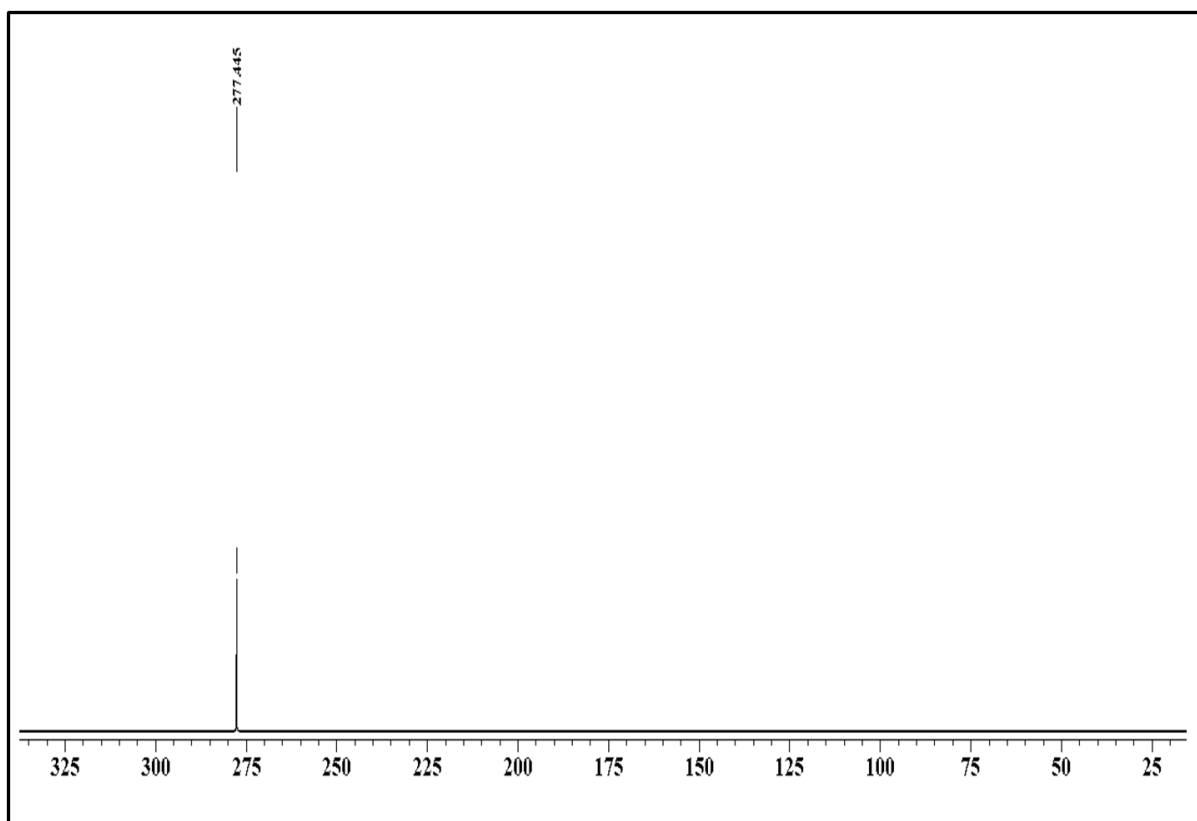

Figure S10.  $^{31}\text{P}$  NMR spectra of compound 1.

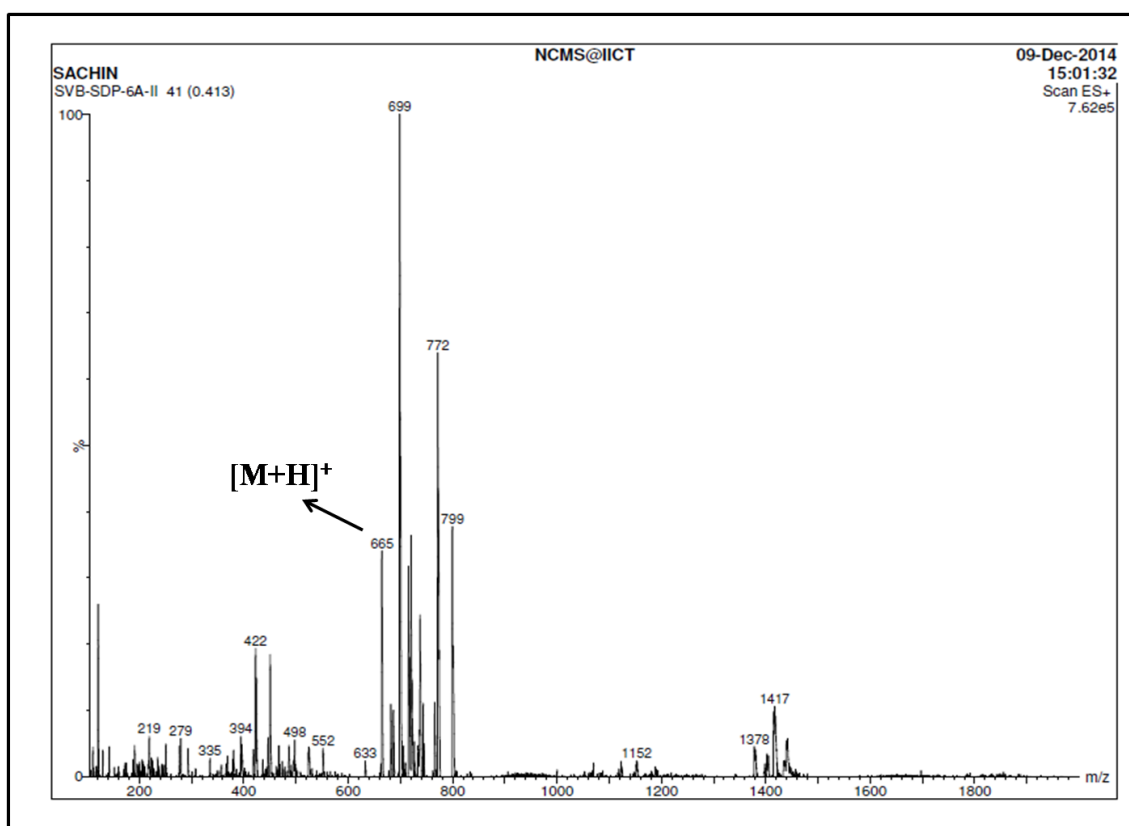

Figure S11. ESI-MS spectra of compound 1.

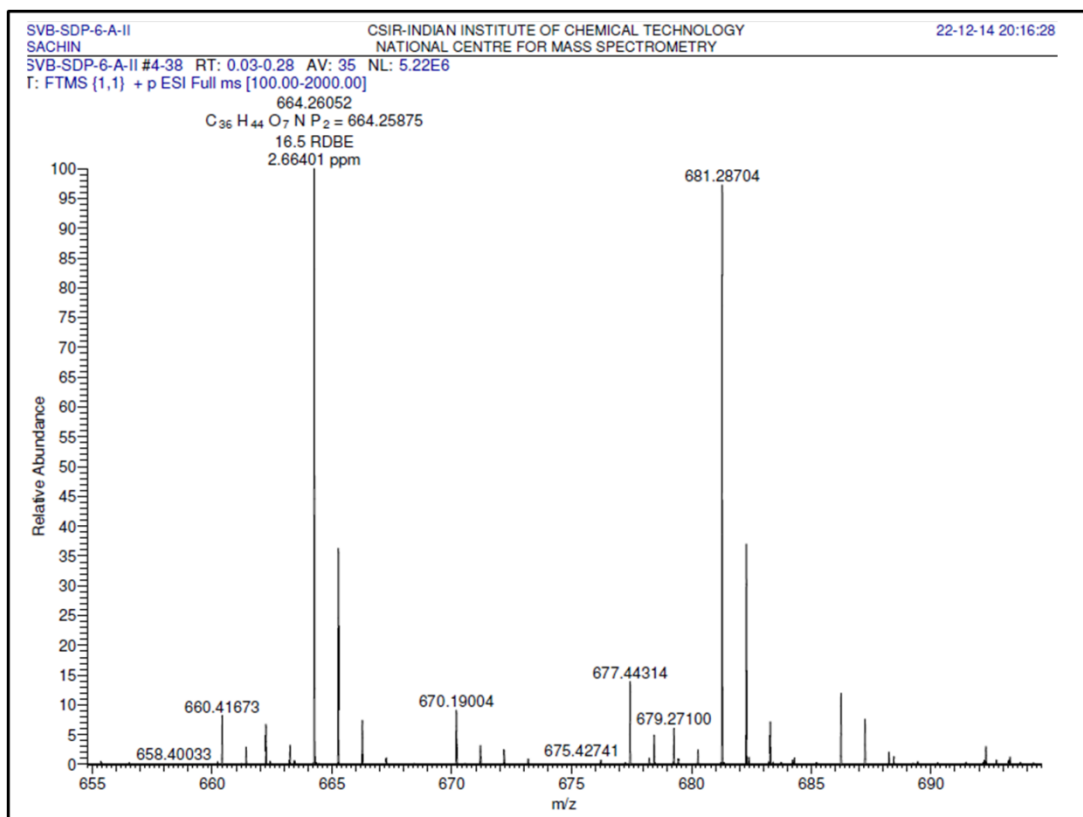

**Figure S12.** ESI-HRMS spectra of compound **1**.
